# Supplementary material for: Polyoxometalates covalently bonded with terpyridine ligandsElectronic supplementary information (ESI) available: experimental. See http://www.rsc.org/suppdata/cc/b3/b307415c/
Source: Royal Society of Chemistry journal article supplement (doi:10.1039/b307415c), 2003-01-01
Supplement: b307415c.doc [file b307415c.doc]

*Supplementary Information*

Polyoxometalates Covalently bonded with terpyridine ligands

Bubin Xu, *a* Zhonghua Peng,**a* Yongge Wei,a and Douglas R. Powell*b*

a Department of Chemistry, University of Missouri-Kansas City, Kansas City, MO 64110, USA. Fax: 913-235-2290; Tel: 913-235-2288; E-mail: pengz@umkc.edu

b Department of Chemistry, University of Kansas, Lawrence, Kansas66045, USA

**Compound 2**. A mixture containing 4-Ethynyl-2,6-dimethylaniline (0.5 g, 3.44 mmol), compound **1** (1.27 g, 3.34 mmol), bis(triphenylphosphine)palladium (II) chloride (48 mg, 0.07 mmol), copper (I) iodide (24 mg, 0.13 mmol), DMF (25 mL), and triethylamine (2 mL) was stirred at room temperature for 20 hours. Methylene chloride (200 mL) was then added to the reaction mixture, and the resulting solution was washed with water (3  200 mL). The organic layer was collected, and the solvent was removed. The resulting crude product was purified by chromatography using hexanes/ethyl acetate/triethylamine (3/1/0.3 v/v/v) as the eluent to yield compound **2** as off-white solids ( 1.1 g, 85%). Mp 208-211 ºC. 1H NMR (CDCl3, 400 MHz)*δ* 2.16 (s, 6 H, -CH3), 3.79 (s, 2 H, -NH2), 7.17 (s, 2 H, Ar-H), 7.29-7.32 (m, 2 H, Ar-H), 7.83 (t, *J* = 7.60 Hz, 2 H, Ar-H), 8.49 (s, 2 H, Ar-H), 8.58 (d, *J* = 8.00 Hz, 2 H, Ar-H), 8.68-8.69 (m, 2 H, Ar-H). 13C NMR (CDCl3, 100 MHz)*δ* 17.62, 85.88, 95.94, 111.17, 121.41, 121.64, 122.78, 124.05, 132.44, 134.58, 137.03, 144.36, 149.38, 155.58, 156.20.

**Compound 3**. Compound **2** (0.2 g, 0.53 mmol), dicyclohexylcarbodiimide (0.22 g, 1.07 mmol), and hexamolybdate (4.5 g, 3.3 mmol) were combined and refluxed in acetonitrile (10 mL) for 14 hours. After cooling to room temperature, the by-product (N, N'-dicyclohexylurea) was removed by filtration. The filtrate was evaporated, and the residue was re-dissolved in acetone (10 mL). The insoluble solids were collected by filtration as the crude product, which was purified by recrystallization from acetonitrile to afford compound **3** as an orange-red powder (0.5 g, 54%). 1H NMR (CD3CN, 400 MHz)*δ* 0.96 (t, *J* = 7.2 Hz, 24 H, -CH3), 1.31-1.41 (m, 16 H, -CH2-), 1.56-1.65 (m, 16 H, -CH2-), 2.58 (s, 6 H, -CH3), 3.07-3.12 (m, 16 H, N-CH2-), 7.33 (s, 2 H, Ar-H), 7.44-7.47 (m, 2 H, Ar-H), 7.96-8.00 (m, 2 H, Ar-H), 8.50 (s, 2 H, Ar-H), 8.65-8.68 (m, 2 H, Ar-H), 8.71-8.73 (m, 2 H, Ar-H). 13C NMR (CD3CN, 100 MHz)*δ* 13.12, 17.71, 19.66, 23.68, 58.68, 58.71, 58.73, 89.38, 93.42, 121.28, 122.56, 124.75, 130.88, 133.15, 137.56, 138.54, 149.72, 155.48, 156.18. Anal. Calcd. for C57H90Mo6N6O18: C, 39.73; H, 5.26; N, 4.88; Mo, 33.41. Found: C, 39.76; H, 5.12; N, 4.90; Mo, 31.87. LRMS (ESI in CH3CN) calcd. for C57H90N6O18Mo6: 1722.07. Found: 1963.94 (M + NBu4+)+, 1480.31 (M - NBu4+)-.
